# Supplementary material for: Profile of miR-23 Expression and Possible Role in Regulation of Glutamic Acid Decarboxylase during Postnatal Retinal Development
Source: MDPI journal article supplement (doi:10.3390/ijms22137078), 2021-06-30
Supplement: s1 [file s1]

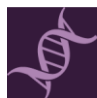

Article

# Profile of mir-23 expression and possible role in regulation of glutamic acid decarboxylase during postnatal retinal development

Etelka Pöstyéni <sup>1</sup>, Andrea Kovács-Valasek<sup>1\*</sup>, Péter Urbán<sup>2</sup>, Lilla Czuni<sup>2</sup>, György Sétáló Jr.<sup>3</sup>, Csaba Fekete<sup>2</sup> and Robert Gabriel<sup>1\*</sup>

<sup>1</sup> Department of Experimental Zoology and Neurobiology, University of Pécs, 7624 Pécs, Hungary; etelka91@gamma.ttk.pte.hu (E.P.); valasek@gamma.ttk.pte.hu (A.K.-V.); gabriel@ttk.pte.hu (R.G.)

<sup>2</sup> János Szentágothai Research Centre, Pécs, 7624, Hungary; urpe.89@gmail.com (P.U.); czuni.lilla@gmail.com (L.C.); fekefe@gamma.ttk.pte (C.F.)

<sup>3</sup> Department of Medical Biology, Medical School, University of Pécs, 7624 Pécs, Hungary; gyor-gy.setalo.jr@aok.pte.hu (G.S.J.)

\* Correspondence: gabriel@ttk.pte.hu, valasek@gamma.ttk.pte.hu

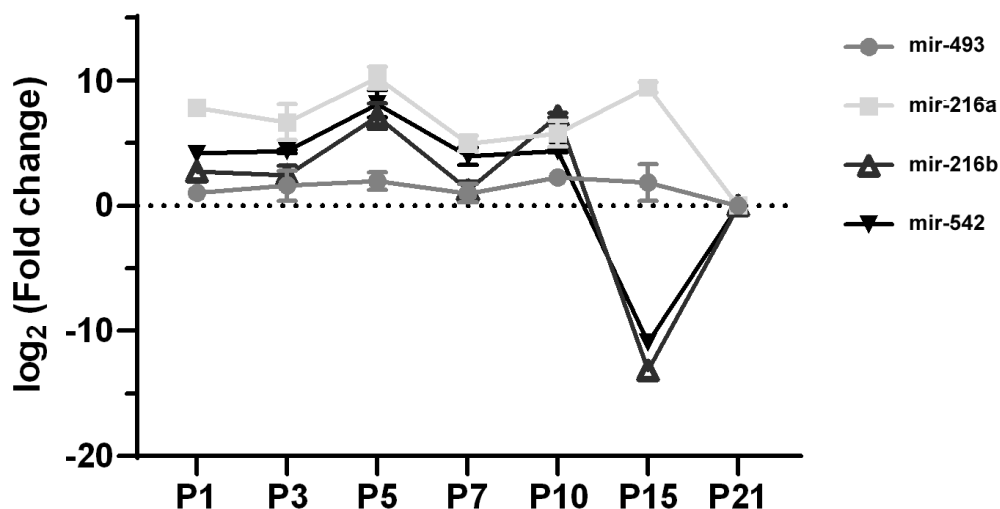

**Figure S1.** Expression alteration of miRNAs revealed by RNA-sequencing. Fold changes are represented as log<sub>2</sub> Fold change compared to P21.

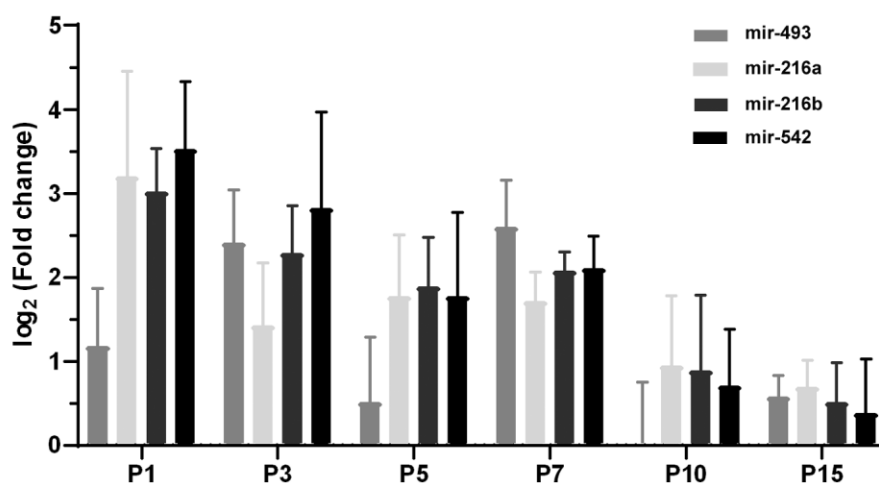

**Figure S2.** Expression alteration of miRNAs revealed by qPCR measurements. The change in the miRNA expression was calculated with U6snRNA as reference gene for normalization. Fold changes are represented as log<sub>2</sub> Fold change compared to P21.

**Table S1.** Multiple comparison of miRNAs expression in different time points analyzed by ordinary one-way ANOVA with Tukey's post-hoc test. Data obtained from RT-qPCR and miRNA-sequencing (\*  $p < 0.05$ , \*\*  $p < 0.01$ , \*\*\*  $p < 0.001$ , \*\*\*\*  $p < 0.0001$ ).

| mir-25<br>RT-qP |    | P1 | P3              | P5              | P7            | P10           | P15             | P21             |
|-----------------|----|----|-----------------|-----------------|---------------|---------------|-----------------|-----------------|
|                 | P1 | -  | ****<br><0.0001 | ****<br><0.0001 | ***<br>0.0001 | ***<br>0.0004 | ****<br><0.0001 | ****<br><0.0001 |

|     |   |                 |                 |                 |                 |                 |
|-----|---|-----------------|-----------------|-----------------|-----------------|-----------------|
| P3  | - | ****<br><0.0001 | *<br>0.0298     | ****<br><0.0001 | ****<br><0.0001 | ****<br><0.0001 |
| P5  |   | -               | ****<br><0.0001 | ns              | ****<br><0.0001 | ns              |
| P7  |   |                 | -               | ****<br><0.0001 | ****<br><0.0001 | ****<br><0.0001 |
| P10 |   |                 |                 | -               | ****<br><0.0001 | ns              |
| P15 |   |                 |                 |                 | -               | ***<br>0.0004   |
| P21 |   |                 |                 |                 |                 | -               |

|                  | P1  | P3 | P5           | P7 | P10 | P15          | P21             |
|------------------|-----|----|--------------|----|-----|--------------|-----------------|
| mir-23 miRNA-Seq | P1  | -  | ns<br>0.0162 | ns | ns  | **<br>0.0017 | ****<br><0.0001 |
|                  | P3  | -  | ns           | ns | ns  | ns           | ***<br>0.0002   |
|                  | P5  |    | -            | ns | ns  | ns           | ns              |
|                  | P7  |    |              | -  | ns  | ns           | *<br>0.0262     |
|                  | P10 |    |              |    | -   | ns           | ns              |
|                  | P15 |    |              |    |     | -            | ns              |
|                  | P21 |    |              |    |     |              | -               |

|                  | P1  | P3 | P5           | P7          | P10         | P15             | P21             |
|------------------|-----|----|--------------|-------------|-------------|-----------------|-----------------|
| mir-216a RT-qPCR | P1  | -  | **<br>0.0022 | *<br>0.0257 | *<br>0.0169 | ****<br><0.0001 | ****<br><0.0001 |
|                  | P3  | -  | ns           | ns          | ns          | ns              | *<br>0.0255     |
|                  | P5  |    | -            | ns          | ns          | ns              | **<br>0.0021    |
|                  | P7  |    |              | -           | ns          | ns              | **<br>0.0035    |
|                  | P10 |    |              |             | -           | ns              | ns              |
|                  | P15 |    |              |             |             | -               | ns              |
|                  | P21 |    |              |             |             |                 | -               |

|                    |     |    |    |                 |                 |                 |                 |                 |
|--------------------|-----|----|----|-----------------|-----------------|-----------------|-----------------|-----------------|
| P21                |     | -  |    |                 |                 |                 |                 |                 |
|                    |     | P1 | P3 | P5              | P7              | P10             | P15             | P21             |
| mir-216a miRNA-Seq | P1  | -  | ns | ****<br><0.0001 | ****<br><0.0001 | ***<br>0.0002   | **<br>0.007     | ****<br><0.0001 |
|                    | P3  |    | -  | ****<br><0.0001 | **<br>0.0037    | ns              | ****<br><0.0001 | ****<br><0.0001 |
|                    | P5  |    |    | -               | ****<br><0.0001 | ****<br><0.0001 | ns              | ****<br><0.0001 |
|                    | P7  |    |    |                 | -               | ns              | ****<br><0.0001 | ****<br><0.0001 |
|                    | P10 |    |    |                 |                 | -               | ****<br><0.0001 | ****<br><0.0001 |
|                    | P15 |    |    |                 |                 |                 | -               | ****<br><0.0001 |
|                    | P21 |    |    |                 |                 |                 |                 | -               |
|                    |     | P1 | P3 | P5              | P7              | P10             | P15             | P21             |
| mir-216b RT-qPCR   | P1  | -  | ns | **<br>0.0089    | ns              | ****<br><0.0001 | ****<br><0.0001 | ****<br><0.0001 |
|                    | P3  |    | -  | ns              | ns              | ***<br>0.0005   | ****<br><0.0001 | ****<br><0.0001 |
|                    | P5  |    |    | -               | ns              | *<br>0.0314     | ***<br>0.0007   | ****<br><0.0001 |
|                    | P7  |    |    |                 | -               | **<br>0.005     | ****<br><0.0001 | ****<br><0.0001 |
|                    | P10 |    |    |                 |                 | -               | ns              | ns              |
|                    | P15 |    |    |                 |                 |                 | -               | ns              |
|                    | P21 |    |    |                 |                 |                 |                 | -               |
|                    |     | P1 | P3 | P5              | P7              | P10             | P15             | P21             |
| mir-216b miRNA-Seq | P1  | -  | ns | ****<br><0.0001 | ****<br><0.0001 | ****<br><0.0001 | ****<br><0.0001 | ****<br><0.0001 |
|                    | P3  |    | -  | ****<br><0.0001 | **<br>0.0011    | ****<br><0.0001 | ****<br><0.0001 | ****<br><0.0001 |

|                   |     |    |              |               |                 |                 |                 |                 |
|-------------------|-----|----|--------------|---------------|-----------------|-----------------|-----------------|-----------------|
| mir-495 RT-qPCR   | P5  |    |              | -             | ****<br><0.0001 | ns              | ****<br><0.0001 | ****<br><0.0001 |
|                   | P7  |    |              |               | -               | ****<br><0.0001 | ****<br><0.0001 | *** 0.0009      |
|                   | P10 |    |              |               |                 | -               | ****<br><0.0001 | ****<br><0.0001 |
|                   | P15 |    |              |               |                 |                 | -               | ****<br><0.0001 |
|                   | P21 |    |              |               |                 |                 |                 | -               |
|                   |     |    |              |               |                 |                 |                 |                 |
| mir-495 miRNA-Seq |     | P1 | P3           | P5            | P7              | P10             | P15             | P21             |
|                   | P1  | -  | ns           | ns            | ns              | ns              | ns              | ****<br><0.0001 |
|                   | P3  |    | -            | ns            | ns              | ns              | ns              | ****<br><0.0001 |
|                   | P5  |    |              | -             | ns              | ns              | ns              | ****<br><0.0001 |
|                   | P7  |    |              |               | -               | ns              | ns              | ****<br><0.0001 |
|                   | P10 |    |              |               |                 | -               | ns              | ****<br><0.0001 |
|                   | P15 |    |              |               |                 |                 | -               | ****<br><0.0001 |
|                   | P21 |    |              |               |                 |                 |                 | -               |
| mir-495 miRNA-Seq |     | P1 | P3           | P5            | P7              | P10             | P15             | P21             |
|                   | P1  | -  | **<br>0.0079 | ***<br>0.0004 | **<br>0.0048    | **<br>0.0074    | **<br>0.0014    | ***<br>0.0003   |
|                   | P3  |    | -            | ns            | ns              | ns              | ns              | ns              |
|                   | P5  |    |              | -             | ns              | ns              | ns              | ns              |
|                   | P7  |    |              |               | -               | ns              | ns              | ns              |
|                   | P10 |    |              |               |                 | -               | ns              | ns              |
|                   | P15 |    |              |               |                 |                 | -               | ns              |

|                   |     |     |    |                 |                 |                 |                 |                 |                 |
|-------------------|-----|-----|----|-----------------|-----------------|-----------------|-----------------|-----------------|-----------------|
|                   |     | P21 |    |                 |                 |                 |                 |                 | -               |
|                   |     |     | P1 | P3              | P5              | P7              | P10             | P15             | P21             |
| mir-542 RT-qPCR   | P1  | -   | ns | ***<br>0.0002   | **<br>0.0047    | ****<br><0.0001 | ****<br><0.0001 | ****<br><0.0001 | ****<br><0.0001 |
|                   | P3  |     | -  | ns              | ns              | ****<br><0.0001 | ****<br><0.0001 | ****<br><0.0001 | ****<br><0.0001 |
|                   | P5  |     |    | -               | ns              | ns              | **<br>0.0065    | ***<br>0.0002   | ***<br>0.0002   |
|                   | P7  |     |    |                 | -               | **<br>0.006     | ***<br>0.0003   | ****<br><0.0001 | ****<br><0.0001 |
|                   | P10 |     |    |                 |                 | -               | ns              | ns              | ns              |
|                   | P15 |     |    |                 |                 |                 | -               | ns              | ns              |
|                   | P21 |     |    |                 |                 |                 |                 |                 | -               |
|                   |     |     | P1 | P3              | P5              | P7              | P10             | P15             | P21             |
| mir-542 miRNA-Seq | P1  | -   | ns | ****<br><0.0001 | ns              | ns              | ****<br><0.0001 | ****<br><0.0001 | ****<br><0.0001 |
|                   | P3  |     | -  | ****<br><0.0001 | ns              | ns              | ****<br><0.0001 | ****<br><0.0001 | ****<br><0.0001 |
|                   | P5  |     |    | -               | ****<br><0.0001 | ****<br><0.0001 | ****<br><0.0001 | ****<br><0.0001 | ****<br><0.0001 |
|                   | P7  |     |    |                 | -               | ns              | ****<br><0.0001 | ****<br><0.0001 | ****<br><0.0001 |
|                   | P10 |     |    |                 |                 | -               | ****<br><0.0001 | ****<br><0.0001 | ****<br><0.0001 |
|                   | P15 |     |    |                 |                 |                 | -               | ****<br><0.0001 | ****<br><0.0001 |
|                   | P21 |     |    |                 |                 |                 |                 |                 | -               |
|                   |     |     | P1 | P3              | P5              | P7              | P10             | P15             | P21             |
| mir-493 RT-qPCR   | P1  | -   | ns | ns              | *<br>0.0198     | ns              | ns              | ns              | ns              |

| mir-493 miRNA-Seq | P3  | -  | ***<br>0.0005 | ns              | ****<br><0.0001 | ***<br>0.0008 | ****            |
|-------------------|-----|----|---------------|-----------------|-----------------|---------------|-----------------|
|                   | P5  |    | -             | ****<br><0.0001 | ns              | ns            | ns              |
|                   | P7  |    |               | -               | ****<br><0.0001 | ***<br>0.0002 | ****<br><0.0001 |
|                   | P10 |    |               |                 | -               | ns            | ns              |
|                   | P15 |    |               |                 |                 | -             | ns              |
|                   | P21 |    |               |                 |                 |               | -               |
|                   |     |    |               |                 |                 |               |                 |
|                   | P1  | P3 | P5            | P7              | P10             | P15           | P21             |
| P1                | -   | ns | ns            | ns              | ns              | ns            | ns              |
| P3                |     | -  | ns            | ns              | ns              | ns            | **<br>0.0058    |
| P5                |     |    | -             | ns              | ns              | ns            | ***<br>0.0003   |
| P7                |     |    |               | -               | ns              | ns            | ns              |
| P10               |     |    |               |                 | -               | ns            | ****<br><0.0001 |
| P15               |     |    |               |                 |                 | -             | ***<br>0.0009   |
| P21               |     |    |               |                 |                 |               | -               |

**Table S2.** Multiple comparison of GAD1 mRNA expression at different time points analyzed by ordinary one-way ANOVA with Tukey's post-hoc test. (\* p<0.05, \*\* p<0.01, \*\*\* p<0.001, \*\*\*\* p<0.0001).

|    | P1 | P3            | P5              | P7              | P10             | P15             | P21             |
|----|----|---------------|-----------------|-----------------|-----------------|-----------------|-----------------|
| P1 | -  | ***<br>0.0006 | ****<br><0.0001 | ****<br><0.0001 | ****<br><0.0001 | ****<br><0.0001 | ****<br><0.0001 |
| P3 |    | -             | ns              | ns              | **<br>0.0048    | ****<br><0.0001 | ****<br><0.0001 |
| P5 |    |               | -               | ns              | ns              | ***<br>0.0006   | **<br>0.0055    |
| P7 |    |               |                 | -               | ns              | ****<br><0.0001 | ***<br>0.0004   |

|            |   |    |    |
|------------|---|----|----|
| <b>P10</b> | - | ns | ns |
| <b>P15</b> | - | ns |    |
| <b>P21</b> |   |    | -  |

**Table 3.** Ratio of GAD67 positive, mir-23 positive and colabelled cells in every group (a.,) and the ratio of GAD67 positive cells before and after P7 (b.,).

a.,

|     | INL                     |                        |            | GCL                     |                        |            |
|-----|-------------------------|------------------------|------------|-------------------------|------------------------|------------|
|     | mir-23<br>positive cell | GAD67<br>positive cell | colabelled | mir-23<br>positive cell | GAD67<br>positive cell | colabelled |
| P1  | 0%                      | 50%                    | 50%        | 30%                     | 9%                     | 61%        |
| P3  | 38%                     | 63                     | 0%         | 33%                     | 17%                    | 50%        |
| P5  | 10%                     | 60%                    | 30%        | 33%                     | 0%                     | 67%        |
| P7  | 0%                      | 62%                    | 38%        | 34%                     | 0%                     | 66%        |
| P10 | 0%                      | 71%                    | 29%        | 57%                     | 0%                     | 43%        |
| P15 | 0%                      | 96%                    | 4%         | 40%                     | 60%                    | 0%         |
| P21 | 3%                      | 84%                    | 13%        | 86%                     | 0%                     | 14%        |

b.,

|           | INL                  |            | GCL                  |            |
|-----------|----------------------|------------|----------------------|------------|
|           | GAD67 positive cells | colabelled | GAD67 positive cells | colabelled |
| Before P7 | 67%                  | 33%        | 9%                   | 91%        |
| After P7  | 88%                  | 12%        | 25%                  | 75%        |
